# Supplementary material for: Pathobiology of the 129:Stat1 −/− mouse model of human age-related ER-positive breast cancer with an immune infiltrate-excluded phenotype
Source: Springer Nature journal article supplement (doi:10.1186/s13058-017-0892-8), 2017-09-02
Supplement: MOESM1 [file 14970974]

# Additional File 1 (Tables)

Table S1. Tumor Topography

| Age (weeks) | Parity* | Cephalad |           | Caudal   |          |
|-------------|---------|----------|-----------|----------|----------|
|             |         | L        | R         | L        | R        |
| 32          | P       |          |           | 1        |          |
| 48          | P       | 1        |           |          |          |
| 54          | P       | 1        |           |          |          |
| 78          | P       | 1        | 1         |          |          |
| 81          | P       | 1        | 1         |          |          |
| 82          | P       | 1        |           |          |          |
| 106         | P       |          | 1         |          | 1        |
| 73          | N       |          | 1         |          |          |
| 80          | N       |          | 1         |          |          |
| 82          | N       | 1        |           |          |          |
| 84          | N       |          |           | 1        |          |
| 90          | N       |          | 1         |          |          |
| 90          | N       |          | 1         |          |          |
| 90          | N       |          | 1         |          |          |
| 90          | N       |          | 1         |          |          |
| 90          | N       |          | 1         |          |          |
| 92          | N       |          | 1         |          |          |
| 97          | N       |          | 1         |          |          |
| 106         | N       | 2        |           |          |          |
| 115         | N       |          | 1         |          |          |
| Totals      |         | <b>8</b> | <b>13</b> | <b>2</b> | <b>1</b> |

Total for left (L) =10; total for right (R) =14

\*P=Parous; N=Nulliparous

Table S2. Tumor incidence in 129:*Stat1*<sup>-/-</sup> Female Mice

| Age Range (weeks) | Number of Live Animals | Tumor-Free Deceased | Tumor-Bearing Deceased | Total Deceased | Surviving Fraction | Fraction of Mice at Risk |
|-------------------|------------------------|---------------------|------------------------|----------------|--------------------|--------------------------|
| 30-50             | 52                     | 6                   | 2                      | 8              | 0.85               | 0.90                     |
| 50-59             | 44                     | 5                   | 1                      | 6              | 0.73               | 0.85                     |
| 60-69             | 38                     | 0                   | 0                      | 0              | 0.73               | 0.85                     |
| 70-79             | 38                     | 1                   | 2                      | 3              | 0.67               | 0.75                     |
| 80-89             | 35                     | 9                   | 6                      | 15             | 0.38               | 0.45                     |
| 90-99             | 20                     | 8                   | 6                      | 14             | 0.12               | 0.15                     |
| 100-120           | 6                      | 3                   | 3                      | 6              | 0.00               | 0.00                     |
|                   | Totals=                | 32                  | 20                     | 52             |                    |                          |
